# Supplementary material for: Removal of Nickel from Aqueous Solutions by Natural Bentonites from Slovakia
Source: MDPI journal article supplement (doi:10.3390/ma14020282), 2021-01-07
Supplement: s1 [file s1]

# Removal of Nickel from Aqueous Solutions by Natural Bentonites from Slovakia

Matej Šuránek <sup>1</sup>, Zuzana Melichová <sup>1,\*</sup>, Valéria Kureková <sup>2</sup>, Ljiljana Kljajević <sup>3</sup> and Snežana Nenadović <sup>3</sup>

<sup>1</sup> Department of Chemistry, Faculty of Natural Sciences, Matej Bel University, Tajovskeho 40, 97401 Banská Bystrica, Slovakia; matej.suraneck@student.umb.sk

<sup>2</sup> Department, Institute of Inorganic Chemistry, Slovak Academy of Sciences, Dubravská cesta 9, 84536 Bratislava, Slovakia; valeria.bizovska@savba.sk

<sup>3</sup> Department of Materials, Vinča Institute of Nuclear Sciences-National Institute of the Republic of Serbia, University of Belgrade, Belgrade 11000, Serbia; ljiljana@vin.bg.ac.rs (L.K.); msneza@vin.bg.ac.rs (S.N.)

\* Correspondence: zuzana.melichova@umb.sk; Tel.: +421-48-446-7350

**Citation:** Šuránek, M.; Melichová, Z.; Kureková, V.; Kljajević, L.; Nenadović, S. Removal of Nickel from Aqueous Solutions by Natural Bentonites from Slovakia. *Materials* **2021**, *14*, 282. <https://doi.org/10.3390/ma14020282>

Received: 8 December 2020

Accepted: 5 January 2021

Published: 7 January 2021

**Publisher's Note:** MDPI stays neutral with regard to jurisdictional claims in published maps and institutional affiliations.

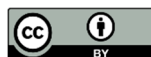

**Copyright:** © 2021 by the authors. Submitted for possible open access publication under the terms and conditions of the Creative Commons Attribution (CC BY) license (<http://creativecommons.org/licenses/by/4.0/>).

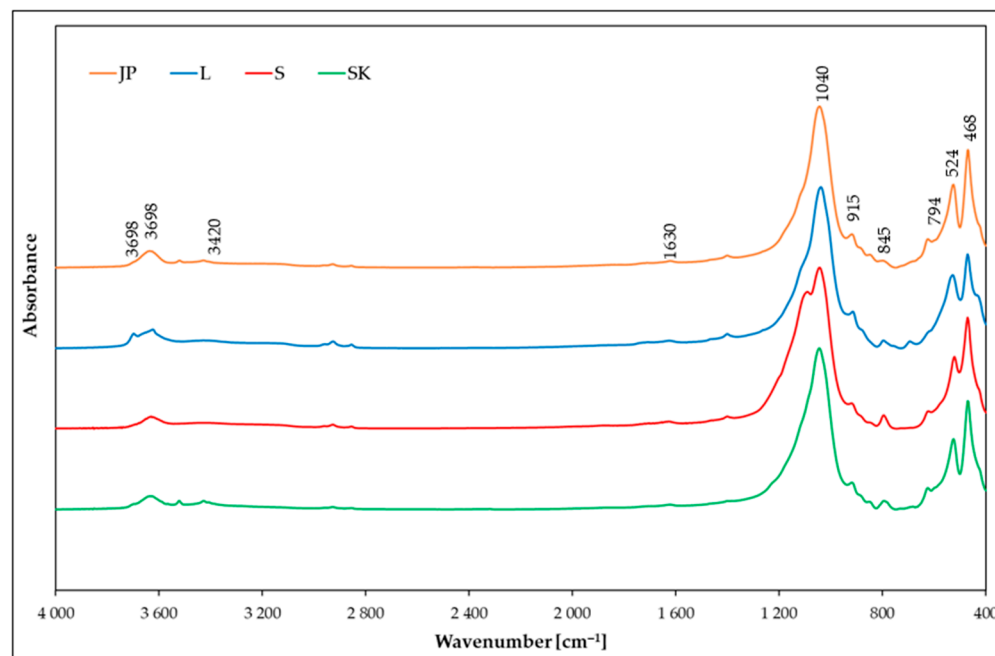

**Figure S1.** IR spectra of used bentonites after adsorption of Ni(II) ions.
